# Supplementary material
Source: Frontiers journal article supplement (https://www.frontiersin.org/articles/130514)

**Figure S2.** Taxonomic GAAS-computed composition of viral metagenomic reads in Saanich Inlet for SI.200<sub>m</sub>.

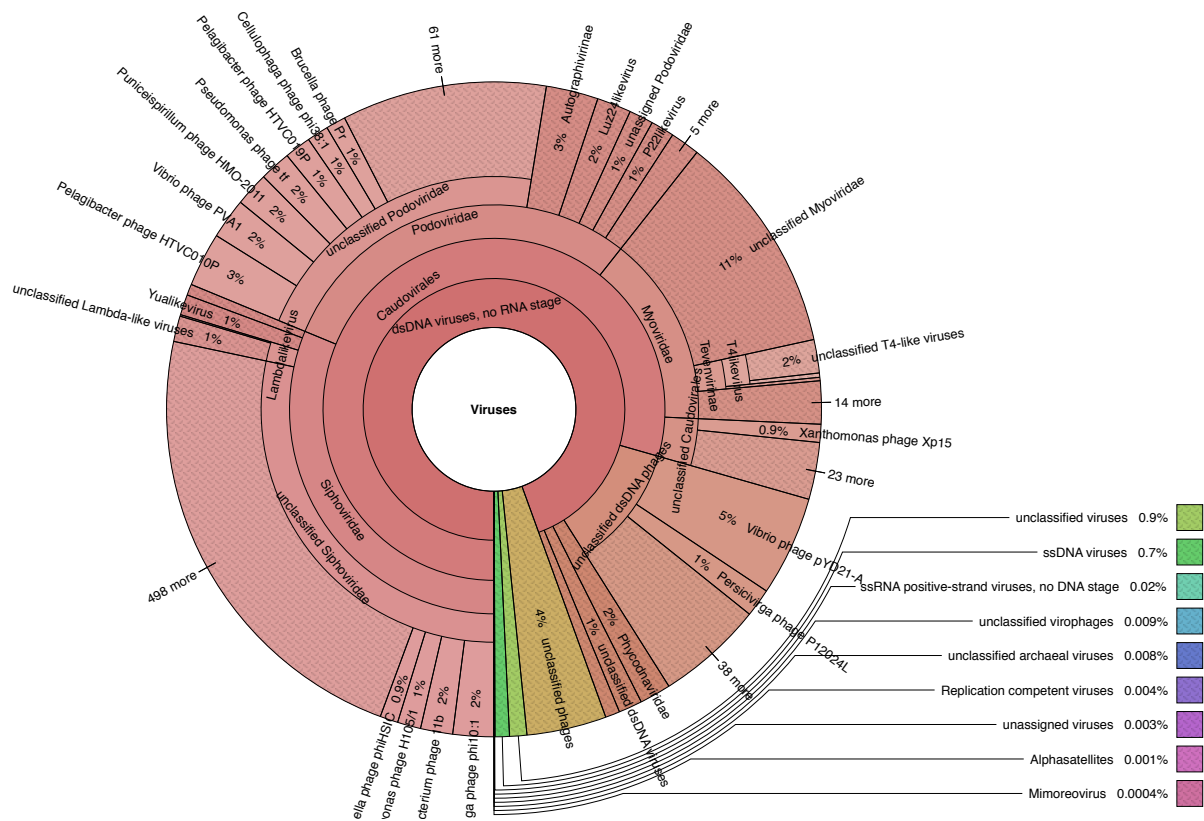

Supplement: Image_2.PDF [file Image_2.PDF]
