# Supplementary material
Source: Frontiers journal article supplement (https://www.frontiersin.org/articles/130514)

**Figure S6. Alignment of three fosmids to a pelagiphage genome (HTVC010P) by MAUVE.** The red and green blocks indicate two collinear genomic regions that are internally homologous across all four genome or fosmid sequences. The line inside each colored block indicates the level of similarity within each block for the specified region.

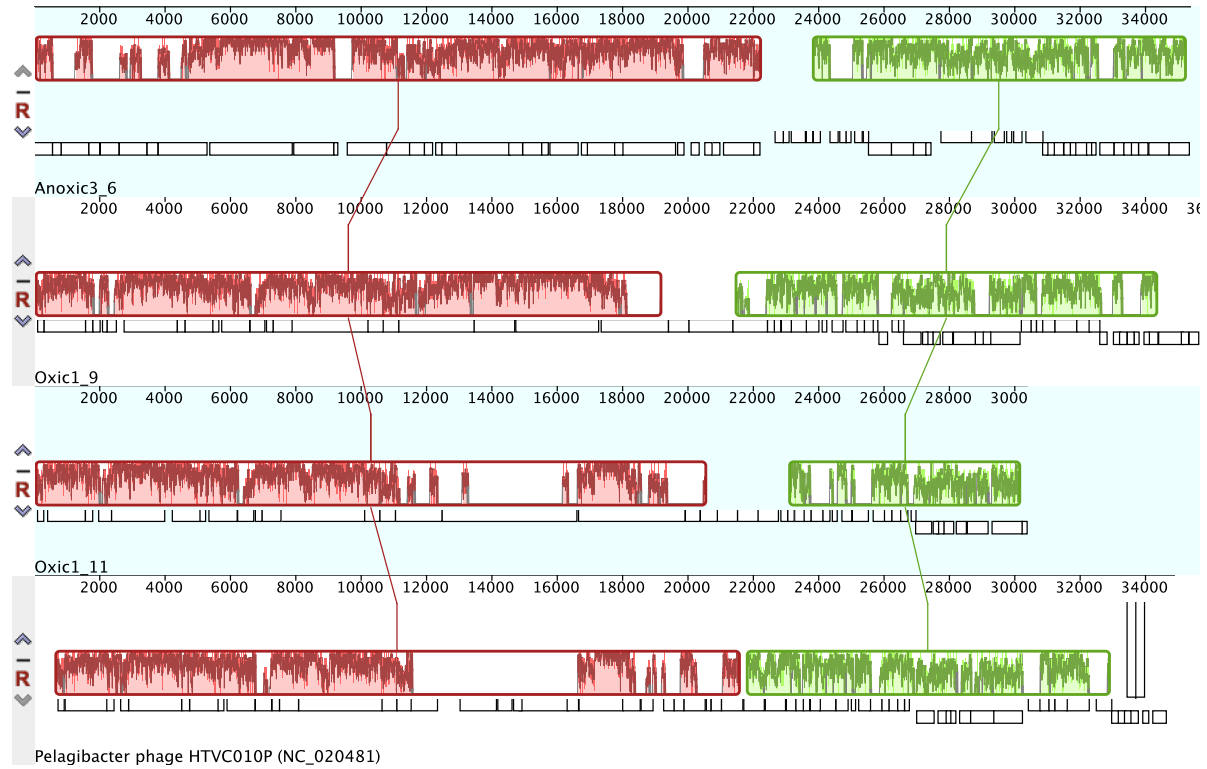

Supplement: Image_6.PDF [file Image_6.PDF]
